# Supplementary material
Source: Springer Nature journal article supplement (https://www.springermedizin.de/resource/supplementary/13256_2012_2358_MOESM1_ESM.pdf/9649622)

# RIGHT EYE

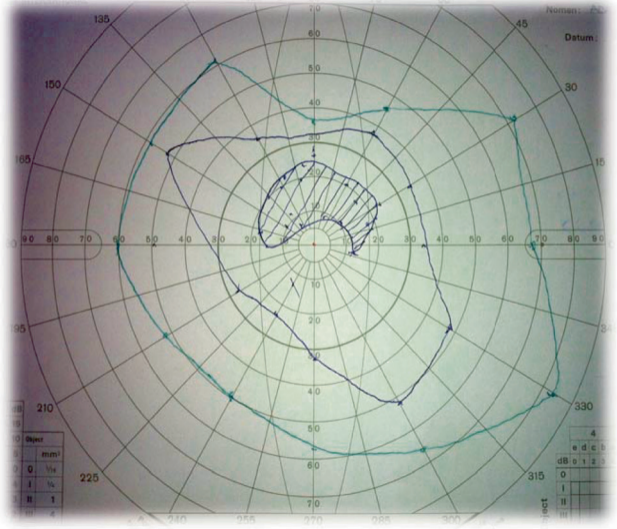

# LEFT EYE

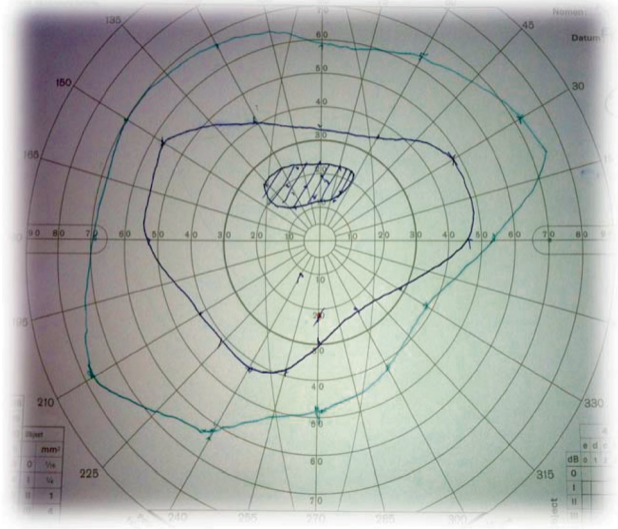

Supplement: MOESM1 [file 9649622]
